# Supplementary material
Source: Springer Nature journal article supplement (https://www.springermedizin.de/resource/supplementary/13033_2009_52_MOESM1_ESM.pdf/9651738)

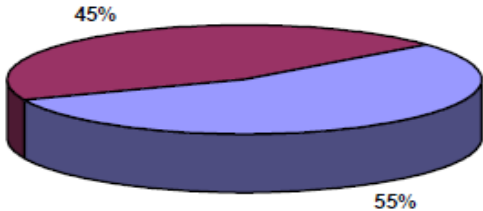

■ EXPENDITURES FOR MENTAL HOSPITALS

■ ALL OTHER MENTAL HEALTH EXPENDITURES

Supplement: MOESM1 [file 9651738]
